# Supplementary material for: Molecular dynamics simulations suggest possible activation and deactivation pathways in the hERG channel
Source: PubMed Central journal article supplement (PMC8873449; doi:10.1038/s42003-022-03074-9), 2022-02-24
Supplement: 42003_2022_3074_MOESM1_ESM.pdf [file 42003_2022_3074_MOESM1_ESM.pdf]

1 Molecular Dynamics simulations suggest possible  
2 activation and deactivation pathways in the  
3 hERG channel

4 Flavio Costa<sup>1</sup>, Carlo Guardiani<sup>1</sup>, and Alberto Giacomello<sup>1,\*</sup>

5 <sup>1</sup>Dipartimento di Ingegneria Meccanica e Aerospaziale, Sapienza  
6 Università di Roma, Via Eudossiana 18 00184 Rome, Italy

7 \*Corresponding author: Alberto Giacomello,  
8 alberto.giacomello@uniroma1.it

9 **Supplementary Notes**

10 **Supplementary Note 1: “Closed structures validation”**

11 We generated the closed states of hERG channel through homology modelling  
12 and Steered Molecular Dynamics simulation. The structures can be assessed  
13 exploiting the rich body of experimental data in the literature. A first piece of  
14 experimental evidence pertains to the state-dependent patterns of salt bridges  
15 between the positively charged residues of helix S4 and the negatively charged  
16 residues on the other helices of the VSD. The different patterns of charge pairings  
17 enable the discrimination of closed and open states. Indeed, these studies date  
18 back to the period when no experimental structure of hERG was available and  
19 specific salt bridges provided spatial constraints for homology modelling. In  
20 particular, charge reversal mutagenesis experiments by Zhang et al [1] revealed  
21 that the K525D and K538D mutations significantly accelerated hERG activation  
22 suggesting these lysines could be involved in salt bridges stabilizing the closed  
23 state. This hypothesis was confirmed by a mutant cycle analysis showing that  
24 D411 (which is peculiar of the EAG family) at the inner end of S1 interacts with  
25 K538 at the inner end of S4, while D456 (conserved among Kv channels) at the  
26 outer end of S2 interacts with K525 at the outer end of S4. Interactions between  
27 charged residues in the trans-membrane segments of hERG may be important  
28 for the known slow activation rate of this channel. In fact, it can be speculated  
29 that the strong salt bridges stabilizing the closed state might be the cause of  
30 the slow movement of S4 [2] during membrane depolarization. As shown in  
31 Supplementary Figure 4, in all of the hERG closed states we generated, using a  
32 distance cutoff of 5.0 Å between the  $\epsilon$ -Nitrogen of the lysines and the  $\delta$ -Oxygen  
33 of the aspartates, we could identify both salt bridge D456-K525 and D411-K538.

34 Another group of contacts stabilizing hERG closed states are those between  
35 the S4-S5 loop and the C-terminal end of helix S6. In particular, Sanguinetti  
36 and coworkers [3, 4] showed that the D540K mutation endowed the hERG chan-  
37 nel with the ability to open in response to membrane hyperpolarization. This  
38 unusual behaviour was shown to stem from the breakdown of the D540-R665  
39 salt bridge and the electrostatic repulsion between the lysine placed in position  
40 540 and R665. Another critical residue located on the S4-S5 loop is E544. While  
41 the mutation to lysine of this residue does not cause hyperpolarization-induced  
42 channel re-opening [3], the E544L mutation significantly enhances the phar-  
43 macologic response to hERG activator NS1643 (see [5] and references therein).  
44 Based on this evidence, Guo et al designed a set of powerful hERG activa-  
45 tors with binding pocket in the neighborhood of D544. The efficacy of these  
46 drugs suggests that they prevent the formation of a critical salt bridge between  
47 E544 and a basic residue on helix S6. This mechanism is also supported by the  
48 observation [6] that covalently binding, through a disulfide bridge, a peptide  
49 mimicking the S4-S5 linker to the channel S6 C-terminus completely inhibits  
50 hERG. It is notable that in these experiments the disulfide bond was intro-  
51 duced between E544C and L666C, suggesting that in physiologic conditions a  
52 salt bridge is established between E544 and R665. Indeed, as illustrated in  
53 Supplementary Figure 4, salt bridge E544-R665 could be observed in all of our  
54 hERG closed states.

## 55 **Supplementary Note 2: “Role of the $G_{cut}$ parameter in the** 56 **network analysis”**

57 In the network analysis the critical parameter is represented by  $G_{cut}$ , the com-  
58 munication distance cutoff below which two nodes of the protein graph are con-  
59 nected by an arc. It differs from the physical distance between two residues (used  
60 in the contact map analysis) that comes into play only in a second stage, when  
61 the communication pathways computed through the network approach must be  
62 validated. Indeed, it may happen that two residues lie next to each other on  
63 a path (because their motion is highly correlated) but they are physically very  
64 far from each other, so that motion cannot be propagated from a residue to the  
65 other. The distance between two residues therefore determines whether a path  
66 is accepted or discarded but has no influence on the length and route followed  
67 by the pathway. These features instead depend on the  $G_{cut}$  parameter that  
68 is related to the minimal correlation coefficient required for two residues to be  
69 considered linked by an edge in the protein graph:  $G_{cut} = -\log|C|_{cut}$ . In the  
70 network analysis we used  $G_{cut}=0.40$  that corresponds to a minimum correlation  
71  $|C|_{cut}=0.67$ . In order to show the role of the  $G_{cut}$  parameter, we repeated the  
72 pathway analysis with two values higher than 0.40 and two values smaller than  
73 0.40 ( $G_{cut} = 0.16, 0.28, 0.69, 1.20$ ).

74 As  $G_{cut}$  decreases two residues will be connected by an edge only if their  
75 correlation is very high. As a result the number of arcs of the network decreases.  
76 Consequently the number of paths connecting a given source node and a given  
77 target node is also expected to decrease. Consistently with this scenario when



78  $G_{cut}=0.16$  no path can be detected in any of the closed structures we produced.  
79 If  $G_{cut}$  is increased to 0.28 no path can be observed in 3 out of 4 subunits  
80 of the systems with gating charge 6e and 8e while in the fourth subunit we  
81 observe a path that is much longer and qualitatively different with respect to  
82 the path computed with  $G_{cut}=0.4$ . Interestingly, in the system with gating  
83 charge 4e the paths computed with  $G_{cut}=0.28$  are qualitatively similar and of  
84 comparable length as compared to the paths computed with  $G_{cut}=0.4$ . It is thus  
85 likely that the edges lying along the minimal paths computed with  $G_{cut}=0.4$   
86 connected pairs of residues with such a highly correlated motion that they were  
87 not removed when  $G_{cut}$  was decreased from 0.40 to 0.28.

88 Conversely as  $G_{cut}$  increases, a smaller and smaller correlation is required  
89 for two residues to be linked by an edge in the graph. As a result, the number of  
90 edges of the network increases and also the number of paths connecting given end  
91 states is expected to grow. However, the minimal paths between a source and a  
92 target node tend to proceed along the shortest edges, i.e., those connecting the  
93 pairs of residues with the most correlated motion. As a result, minimal paths  
94 should to some extent be retained even in the face of an increase of  $G_{cut}$ , even  
95 if the presence of a greater number of edges allows shortcuts that decrease the  
96 length of the path. This is exactly what can be observed with  $G_{cut}=0.69$  and  
97  $G_{cut}=1.20$ : in most cases the minimal paths are qualitatively similar and their  
98 lengths are comparable or slightly shorter than those of the paths computed  
99 with  $G_{cut}=0.40$ . A few paths however, are qualitatively different from those  
100 computed with  $G_{cut}=0.40$ .

101 In hindsight, this analysis shows that the value  $G_{cut}=0.40$  used in the article  
102 corresponds to the maximum value of correlation compatible with the establish-  
103 ment of efficient communication pathways. The paths computed with this value  
104 of  $G_{cut}$  are qualitatively retained up to  $G_{cut}=1.20$  even if some alternative route  
105 starts to appear. The number of these alternative routes is expected to increase  
106 at even higher values of  $G_{cut}$ . The reliability of the results attained using a  
107 graph with edges connecting even weakly correlated pairs of residues, however,  
108 is highly questionable.

### 109 **Supplementary Note 3: “A practical example of pathway 110 calculation”**

111 In order to clarify our protocol, in this section we provide a step-by-step exam-  
112 ple of pathway calculation. The data files used in this example

113  
114 Reg1-Reg2\_L45-Sub4\_S6-Sub1.dat  
115 Minpaths\_L45-Sub4\_S6-Sub1.dat  
116 Centrality\_L45-Sub4\_S6-Sub1\_sort.dat  
117 Cont\_Formation\_Seq\_filt\_sort.dat  
118

119 have been uploaded to the ZENODO repository where the PDB structure  
120 of the system with gating charge 4e where the computed paths can be mapped,  
121 can also be found.

122 The residue numbering appearing in this example is not the official one  
 123 because the first  $\Delta = 397$  residues of hERG (PAS domain) were not included in  
 124 our simulations so that each subunit comprises  $L = 466$  residues. Moreover, the  
 125 four subunits were numbered consecutively. The official numbering of a residue  
 126 can be easily recovered. A residue *ires* in our numbering is located on chain  
 127  $ichain = ires/L + 1$  where we used the integer division. The correct numbering  
 128 of this residue in its subunit is  $ires_{true} = (iresL) + \Delta$  where  $\Delta$  indicates the  
 129 modulus operation.

130 Suppose we want to compute some communication pathway in the system  
 131 with gating charge  $Q_g = 4e$ . We will have to do the following.

### 132 1. Computation of the matrix of correlation coefficients

133 This matrix,  $C$ , is computed with a home-made program from the equi-  
 134 librium simulation. The program also converts the map of correlation  
 135 coefficients in the map of information distances  $G_{ij} = -\log |C_{ij}|$  where

$$C_{ij} = \frac{\langle(\vec{r}_i - \langle\vec{r}_i\rangle)(\vec{r}_j - \langle\vec{r}_j\rangle)\rangle}{\sqrt{\langle(\vec{r}_i - \langle\vec{r}_i\rangle)^2\rangle\langle(\vec{r}_j - \langle\vec{r}_j\rangle)^2\rangle}} \quad (1)$$

136 with  $\vec{r}_i$  and  $\vec{r}_j$  being the position vectors of the  $i$  and  $j$  residues. The ma-  
 137 trix  $G$  of information distances is stored in a file called `mLog_Abs_Correl_Coeff.dat`  
 138 that is fed into another program that performs the proper path calculation.

### 139 2. Determination of source and sink regions

140 The first task performed by the program for pathway calculation is the  
 141 identification of the source and sink regions. To be more specific suppose  
 142 we want to compute the communication pathways between loop L45 of  
 143 subunit IV and helix S6 of subunit I. First of all, we need to choose a cen-  
 144 tral residue in loop L45 and a central residue in helix S6. We chose residue  
 145 1541 in loop L45 and residue 261 in helix S6. The program then identi-  
 146 fies all residues happening to spend at least 70% of the trajectory inside a  
 147 sphere of radius 7.0 Å centered on these two residues. The residues, stored  
 148 in a file called `Reg1-Reg2.L45-Sub4.S6-Sub1.dat`, are listed in Supplemen-  
 149 tary Table 3. The Table shows that residues 1539-1543 with consecutive  
 150 numbering, are all located in the region we are interested in (loop L45)  
 151 while residue 273 that is close to but outside loop L45, will be excluded  
 152 by the analysis. In a similar way, residue 732 will be excluded by the sink  
 153 region. In Supplementary Figure 22 the residues of the source and sink  
 154 regions are mapped on the structure of the hERG channel (for the sake of  
 155 graphical clarity only the S4-L45-S5 region of subunit IV and helix S6 of  
 156 subunit I are shown).

### 157 3. Calculation of minimal paths

158 Once the residues of the source and sink regions have been identified,  
 159 the code applies Dijkstra's algorithm to compute a minimal length path  
 160 for each pair  $i, j$  of residues with  $i \in source$  and  $j \in sink$ . The most  
 161 important inputs to the Dijkstra's subroutine are the matrix of information

162 distances  $G$  and a cutoff distance  $G_{cut}$ . In such a way the algorithm  
163 considers to be linked through an arc only those pairs of residues whose  
164 information distance  $G_{ij}$  is smaller than the chosen cutoff.

165 The procedure of network building from matrix  $G$  is illustrated in Sup-  
166plementary Figure 23. In the trivial example of the figure  $G$  is a  $4 \times 4$   
167 matrix which means that the graph contains 4 nodes. Each row  $i$  of the  
168 matrix stores the information distances between node  $i$  and all other nodes  
169  $j$  of the graph. In the example we assume a cutoff  $G_{cut} = 5$  so that only  
170 pairs of nodes with an information distance smaller than 5 will be con-  
171 nected through an arc. For example node 2 will be connected with node  
172 1 ( $G_{21} = 3 < G_{cut} = 5$ ) and node 3 ( $G_{23} = 2 < G_{cut} = 5$ ) but not to node 4  
173 ( $G_{24} = 7 > G_{cut} = 5$ ). The entries of the matrix act as the weights of the  
174 edges of the network. For instance the arc connecting nodes 1 and 3 has  
175 weight 4 because  $G_{13} = 4$ .

176 The minimal paths thus, are computed using the matrix of information  
177 distances (that on turn derives from the matrix of correlation coefficients)  
178 and not the contact maps. The minimal paths are stored in a path named  
179 Minpaths\_L45-Sub4\_S6-Sub1.dat. Each line of this file has the following  
180 structure:

181 *source, targ, N<sub>res</sub>, Length, res<sub>1</sub>, res<sub>2</sub>, ..., res<sub>N<sub>res</sub></sub>*

182  
183 where *source* and *targ* are the initial and final residues of the path,  
184  $N_{res}$  is the number of residues traversed by the path, *length* is the path  
185 length (sum of the information distances of all the arcs of the path) and  
186  $res_1, res_2, \dots, res_{N_{res}}$  is the sequence of residues actually placed along the  
187 path. For instance the second last line of the file

188  
189 1543 265 5 0.8 1543 1546 1550 266 265

190  
191 indicates a path from residue 1543 to residue 265; the path is composed  
192 by 5 residues and has a length 0.83. More specifically, the five residues  
193 traversed by the path are 1543, 1546, 1550, 266 and 265. This path,  
194 connecting the last residue of the source region with the last residue of  
195 the sink region is shown in Supplementary Figure 24. Even if all the  
196 paths belong to the same family and are qualitatively similar, choosing a  
197 representative path may not be easy. This task is simplified through the  
198 computation of the centrality index which is the next stage of the protocol.

#### 199 4. Calculation of Centrality Index

200 When all the minimal paths have been computed, for each residue of the  
201 protein the code computes a centrality index *i.e.* the fraction of minimal  
202 paths the given residue belongs to. The residues with centrality index  
203 greater than zero are stored in file Centrality\_L45-Sub4\_S6-Sub1.dat. This  
204 file is sorted so that residues are ranked in order of increasing values of

205 the centrality index. If we arbitrarily choose only residues with centrality  
206 index greater than 0.15 and we ignore the residues found in paths starting  
207 from residue 273 (that we excluded from the source region) we find the  
208 following residues: 1539, 1540, 1541, 259, 261, 262, 1542, 1543, 266, 1546,  
209 1550. As shown in Supplementary Figure 25 if these residues with the  
210 highest values of the Centrality Index are mapped on the structure of the  
211 channel, they form a pathway from loop L45 of subunit IV to helix S6  
212 of subunit I. The Figure also shows a cartoon representation of the path  
213 with average length computed over all the minimal paths predicted by  
214 Dijkstra's algorithm.

## 215 5. Pathway validation

216 By now it is clear that the communication pathway was computed with-  
217 out the aid of contact maps. Indeed the graph used for the application  
218 of Dijkstra's algorithm was built using just two ingredients: the matrix of  
219 correlation coefficients and an appropriate cutoff,  $G_{cut}$  of the information  
220 distance. Once the path is computed, however, it is necessary to evaluate  
221 whether it represents a genuine avenue of propagation of a conformational  
222 transition. Indeed, since the calculation was completely based on the ma-  
223 trix of correlation coefficients, the residues lying along the computed path  
224 are characterized by a highly correlated motion. This however, is not  
225 sufficient for the path to be a route of propagation of a conformational  
226 transition. Actually, the residues lying next to each other along the path  
227 must also establish contacts so that the correlated motion can be expres-  
228 sion of a causal influence on one another. For instance, from the top panel  
229 of Supplementary Figure 25 it appears that the uppermost residue of the  
230 pathway along helix S5 is rather distant from the lowermost residue of the  
231 path along helix S6. Thus, to make sure that there can be propagation of  
232 the motion from helix S5 to helix S6, it is necessary to analyze contacts  
233 between these two regions.

234 This is where the contact maps come into play. Indeed, it is rather difficult  
235 to spot a contact between a specific pair of residues watching a whole con-  
236 tact map. This is why the information of interest must be mined from the  
237 data file `Cont_Formation_Seq_filt_sort.dat` that provides the sequence of  
238 contact formation during the TMD trajectory from the open to the closed  
239 state. If we search this file for contacts involving helix S6 of subunit I we  
240 find, among others,

241  
242 TYR 270 1 S6H VAL 1550 4 S5H 201  
243

244 This line simply says that starting from frame 201 there is the stable  
245 establishment of a contact between Val1550 on helix S5 of subunit IV and  
246 Tyr270 on helix S1 of subunit I. This contact is critically important for the  
247 propagation of motion because both residues belong to the communication  
248 pathway and Val1550 is the residue with the highest value of the centrality

249 index, *C.I.* =0.83. This means that Val1550 is involved in 83% of the  
250 minimal paths connecting loop L45 of subunit IV to helix S6 of subunit  
251 I. The visual inspection of the TMD trajectory further clarifies the role of  
252 this contact. The downward motion of helix S4 and the extension of loop  
253 L45, push up helix S5 of subunit IV reducing the distance between Val1550  
254 and Tyr270. This enables the establishment of the Val1550-Tyr270 contact  
255 and through this contact, the propagation of motion.

256 Another interesting contact that emerges from the analysis of file Cont\_Formation\_Seq\_filt\_sort.dat  
257 is

258

259 THR 273 1 S7H SER 1544 4 L45 201

260

261 Even if Ser1544 does not sit on the communication pathway, it is the  
262 residue next to Tyr1543 which is the residue with the third highest cen-  
263 trality index, *C.I.* =0.66. Thr273 on the other hand does not belong to  
264 helix S6 but to helix S7, so that this residue was not included in the sink  
265 region. Thr273, however is close to helix S6 and sink helix S7 is covalently  
266 connected to helix S6, this residue may play a role in the propagation of  
267 motion.

268 **Supplementary Figures**

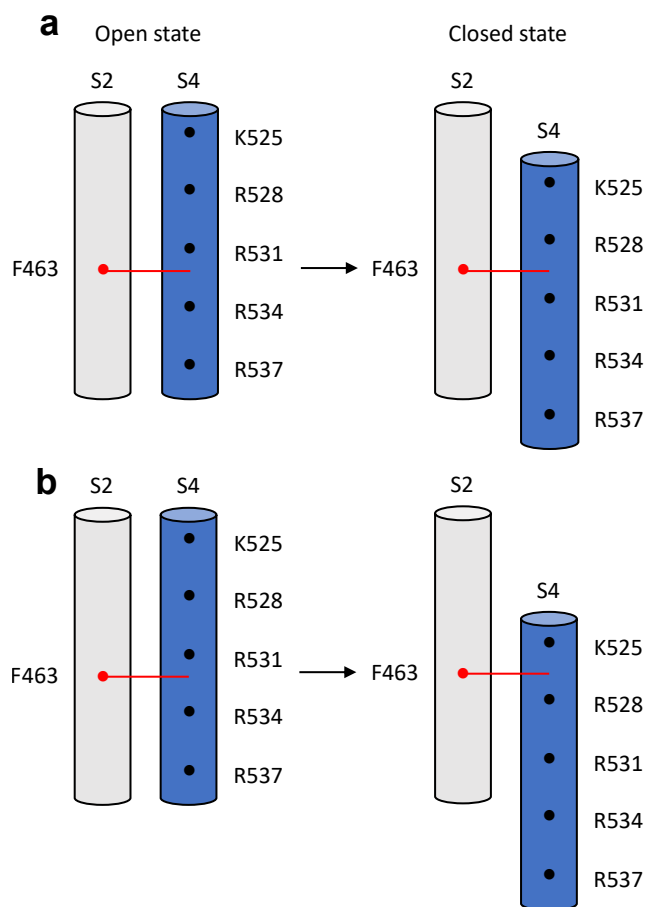

Supplementary Figure 1: Schematic representation of the displacement by one charged residue (**a**) and by two charged residues (**b**) to move the S4 helices in the closed configuration.

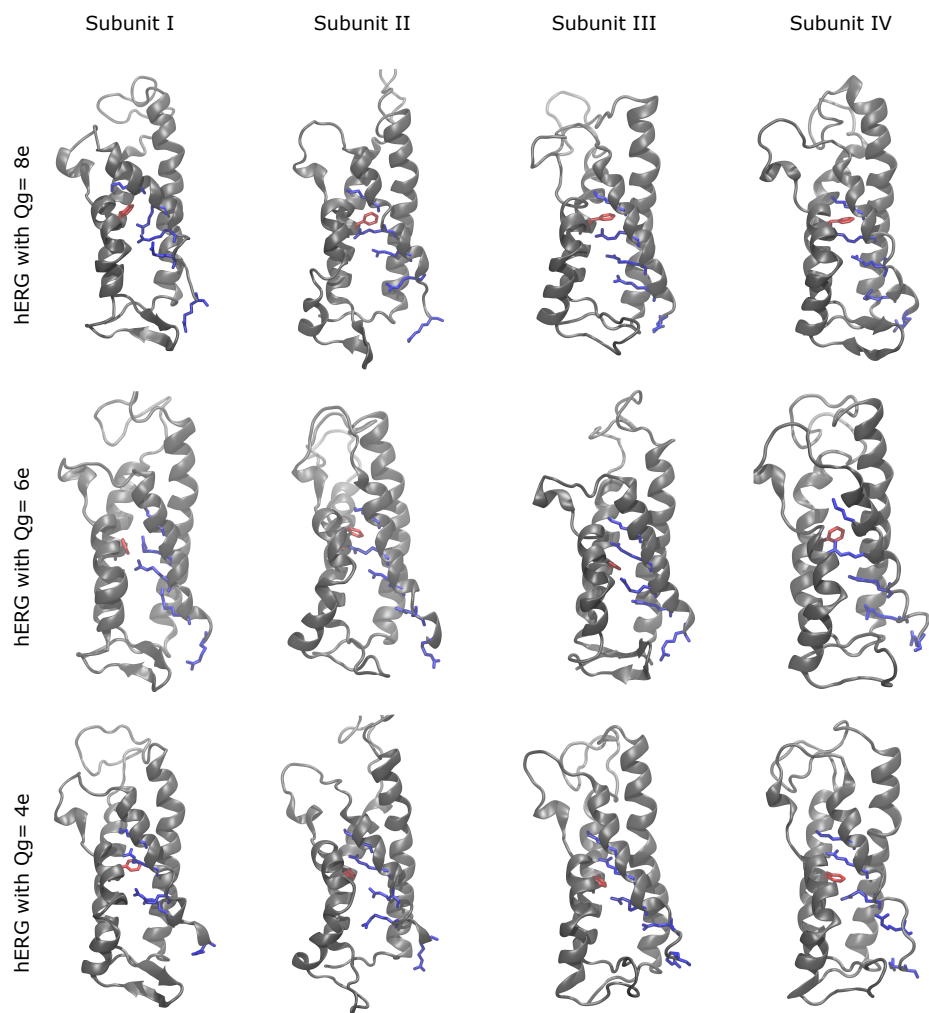

Supplementary Figure 2: S4 configuration in closed states after Steered MD simulations. The positive charged residues on helix S4 (K525, R528, R531, R534 and R537) are coloured in blue while the F463 on helix S2 that acts as the gating charge transfer centre is coloured in red.

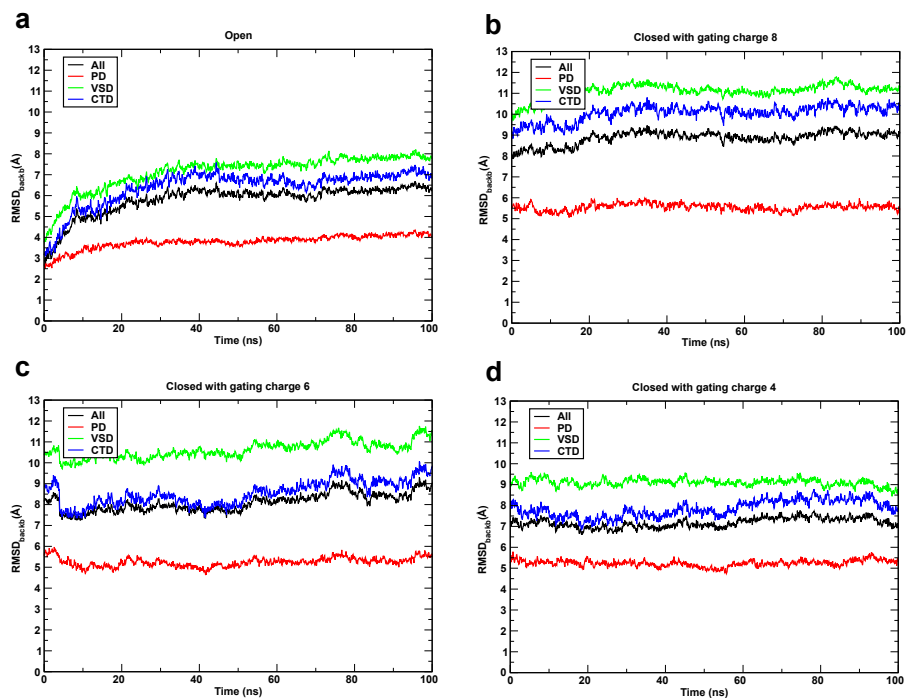

Supplementary Figure 3: The root-mean-square deviation (RMSD) during the 100 ns equilibrium simulations after the Steered MD simulations. Panels refer to: (a) open state; (b) closed state with  $Q_g = 8e$ ; (c) closed state with  $Q_g = 6e$ ; (d) closed state with  $Q_g = 4e$ . The RMSD plot of the open state was computed using as a reference conformation the experimental structure of hERG (PDB: 5VA2). For the RMSD profiles of closed states we used as reference structure, the homology model generated from the template EAG1 (PDB: 5K7L). The superposition of the current and reference conformations was performed using all backbone atoms, while the RMSD calculation was performed using different subsets of backbone atoms corresponding to different domains according to the following color code. Black line: all atoms; red line: pore domain atoms; green line: Voltage Sensor Domain atoms; blue line: Carboxy-Terminal Domain atoms.



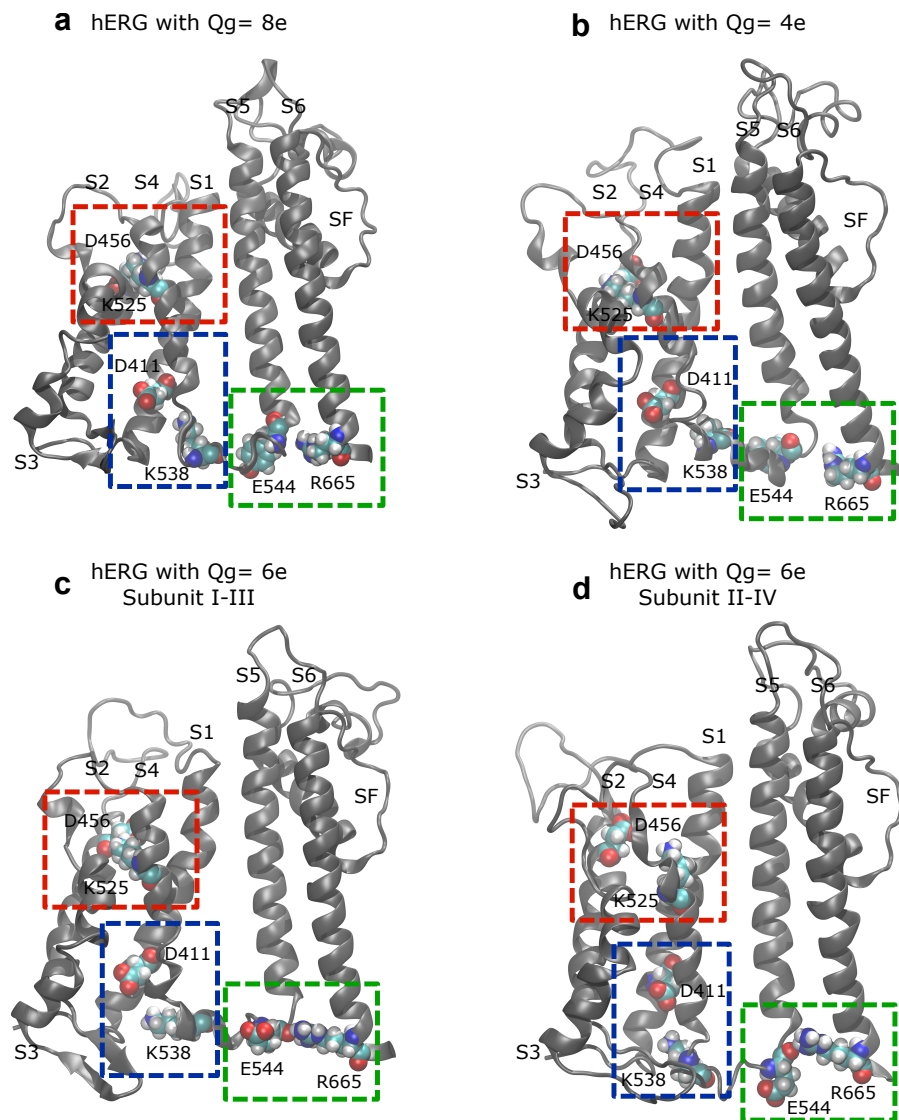

Supplementary Figure 4: Interactions known to stabilize the closed state of hERG: D456-K525 [1], D411-K538 [1] and E544-R665 [3, 6]. For simplicity, in systems with  $Q_g = 8e$  (a) and  $Q_g = 4e$  (b) the first subunit is shown after the equilibration; Panels c and d show the first and the second subunits of the system with  $Q_g = 6e$  that are in the same configuration of the third and the fourth subunits respectively.

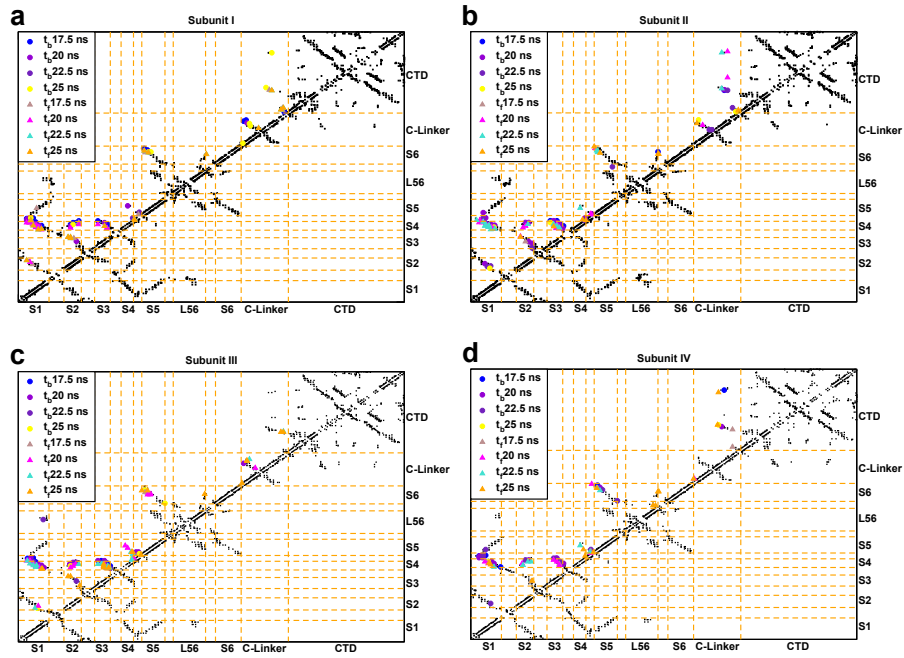

Supplementary Figure 5: Contact maps of each subunit of the system with  $Q_g = 8e$  during the transition from O to C state. The black dots represent the contacts in the initial open conformation while the coloured symbols indicate the contacts formed or broken at different times  $t$  during the TMD simulation in the first subunit (a), in the second subunit (b), in the third subunit (c) and in the fourth subunit (d).

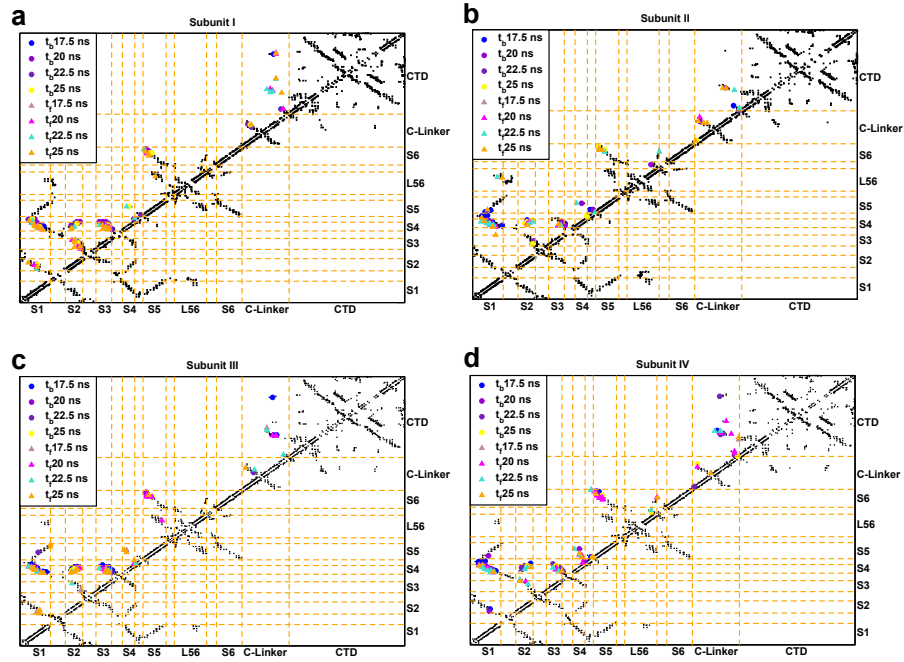

Supplementary Figure 6: Contact maps of each subunit of the system with  $Q_g = 6e$  during the transition from O to C state. The black dots represent the contacts in the initial open conformation while the coloured symbols indicate the contacts formed or broken at different times  $t$  during the TMD simulation in the first subunit (a), in the second subunit (b), in the third subunit (c) and in the fourth subunit (d).

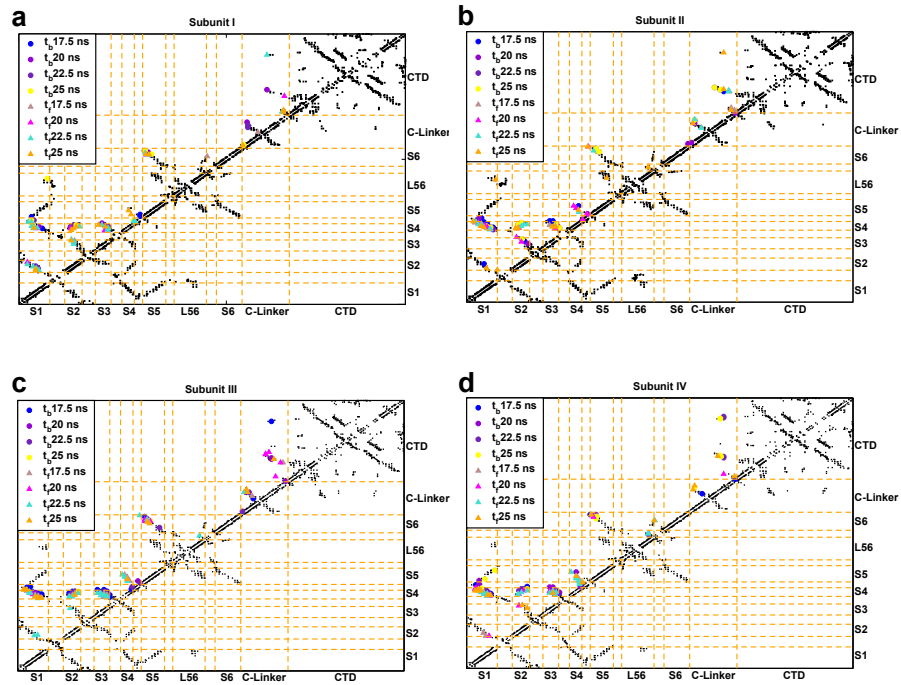

Supplementary Figure 7: Contact maps of each subunit of the system with  $Q_g = 4e$  during the transition from O to C state. The black dots represent the contacts in the initial open conformation while the coloured symbols indicate the contacts formed or broken at different times  $t$  during the TMD simulation in the first subunit (a), in the second subunit (b), in the third subunit (c) and in the fourth subunit (d).

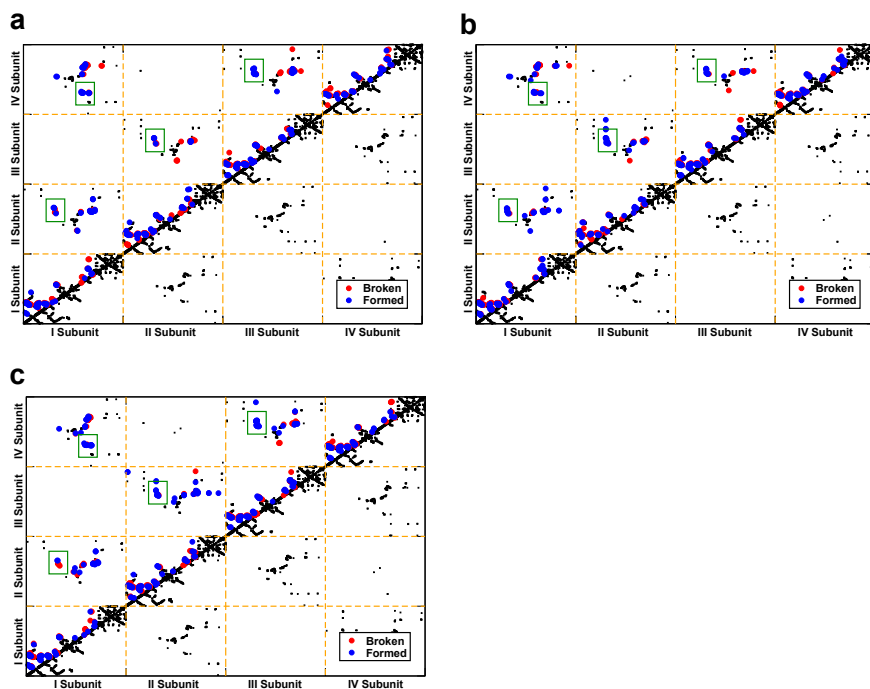

Supplementary Figure 8: Contact maps of the whole protein during the transition from O to C. Panels refer to systems with  $Q_g = 8e$  (a),  $6e$  (b),  $4e$  (c). Conserved interactions between the loop L45 of subunit  $n$  and the C-Linker of subunit  $n + 1$  are highlighted in green boxes. The black dots represent the contacts in the initial open conformation while the coloured symbols indicate the contacts formed or broken.

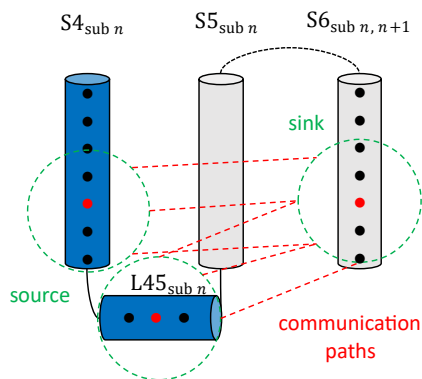

Supplementary Figure 9: Illustration of the communication path method; the source and sink regions are highlighted in green.

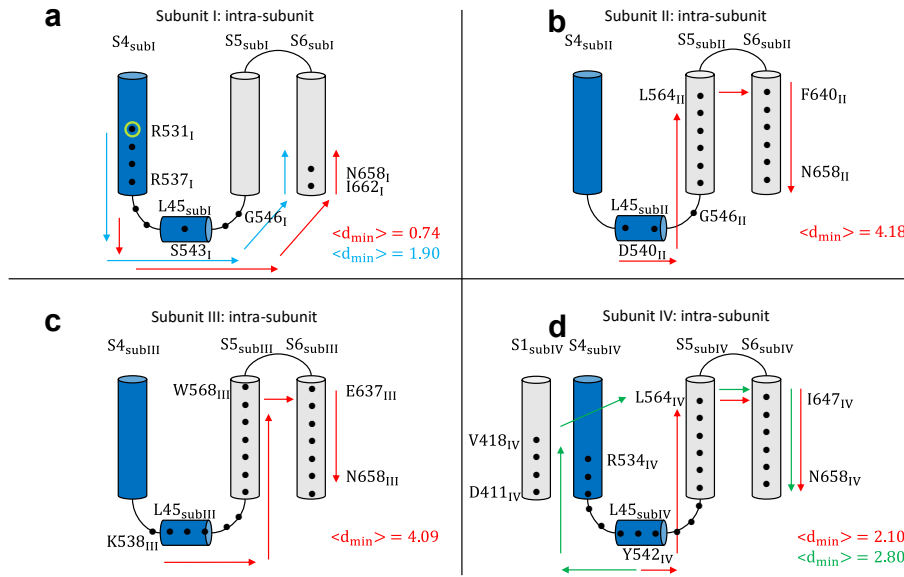

Supplementary Figure 10: Activation/deactivation pathways of the closed system with gating charge 6e. Paths identified in the first subunit (a), in the second subunit (b), in the third subunit (c) and in the fourth subunit (d). Arrows describe the preferred routes of motion propagation: blue arrows refer to  $S4 \rightarrow L45 \rightarrow S6$  route; red arrows refer to  $L45 \rightarrow S6$  or  $L45 \rightarrow S5 \rightarrow S6$  route; green arrows refer to  $S4 \rightarrow S1 \rightarrow S5 \rightarrow S6$ . Black dots correspond to residues on the path with  $CI > 0.15$  (see Table S1); yellow circles refer to the pathological mutation R531Q/W [7] known to alter the gating of the channel inducing the LQTS. The mutations W410S, Y420C and T421M impair both the trafficking and the gating [8]. Average minimal path lengths  $\langle d_{\min} \rangle$  are also reported.

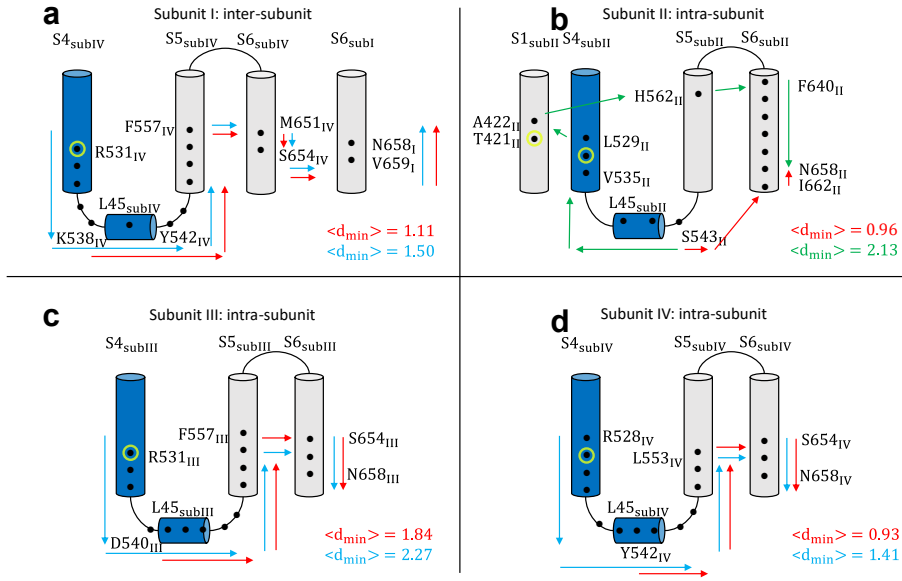

Supplementary Figure 11: Activation/deactivation pathways of the closed system with gating charge  $4e$ . Paths identified in the first subunit (a), in the second subunit (b), in the third subunit (c) and in the fourth subunit (d). Arrows describe the preferred routes of motion propagation: blue arrows refer to  $S4 \rightarrow L45 \rightarrow S6$  route; red arrows refer to  $L45 \rightarrow S6$  or  $L45 \rightarrow S5 \rightarrow S6$  route; green arrows refer to  $S4 \rightarrow S1 \rightarrow S5 \rightarrow S6$ . Black dots correspond to residues on the path with  $CI > 0.15$  (see Table S1); yellow circles refer to the pathological mutation R531Q/W [7] known to alter the gating of the channel inducing the LQTS. The mutations W410S, Y420C and T421M impair both the trafficking and the gating [8]. Average minimal path lengths  $\langle d_{\min} \rangle$  are also reported.

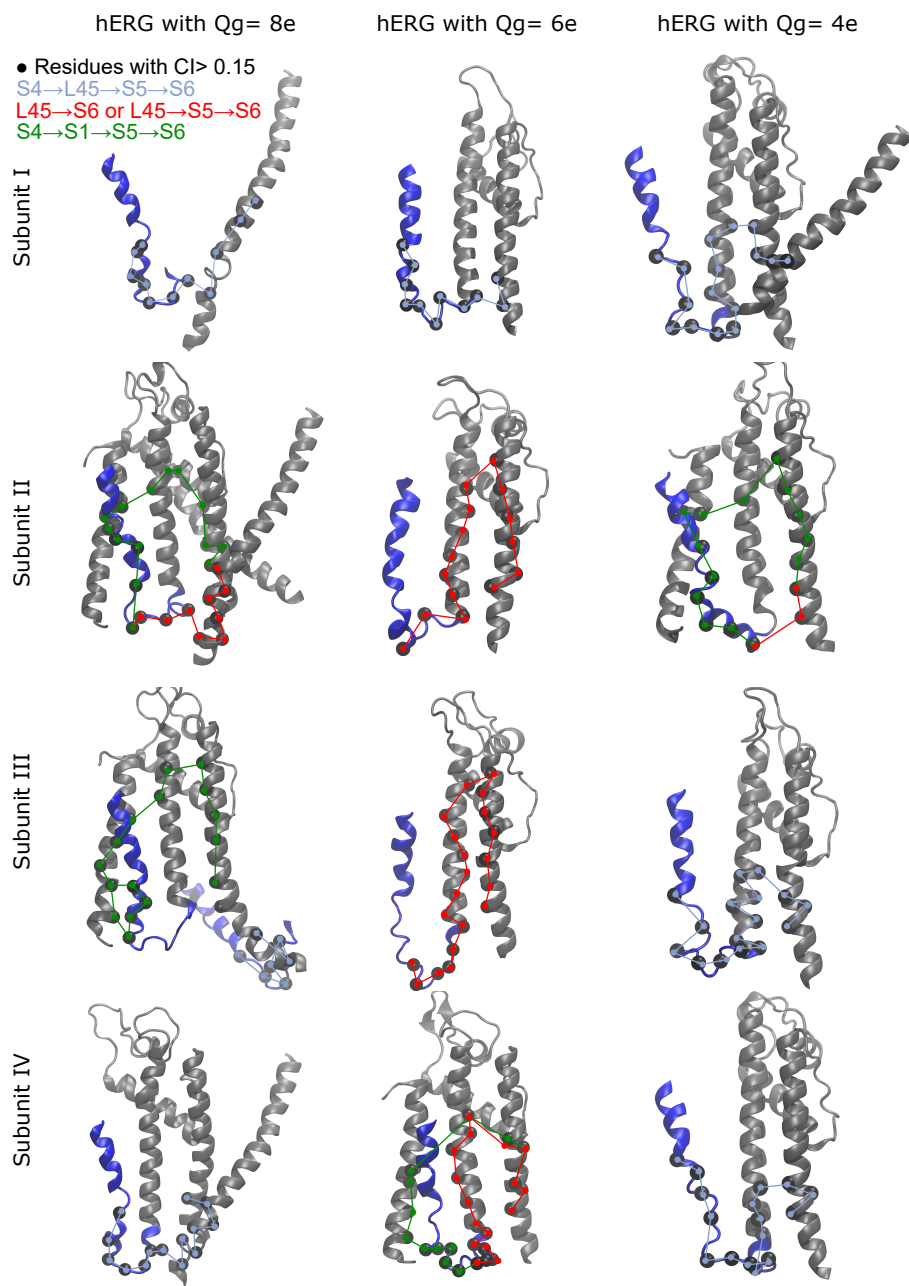

Supplementary Figure 12: Communication pathways of the motion propagation identified in hERG. S4 helix and loop L45 are coloured in blue; black dots are the protein residues on the path with CI > 0.15. The S4→L45→S5→S6 route is coloured in blue, the L45→S6 or L45→S5→S6 routes are in red and the S4→S1→S5→S6 path is in green.



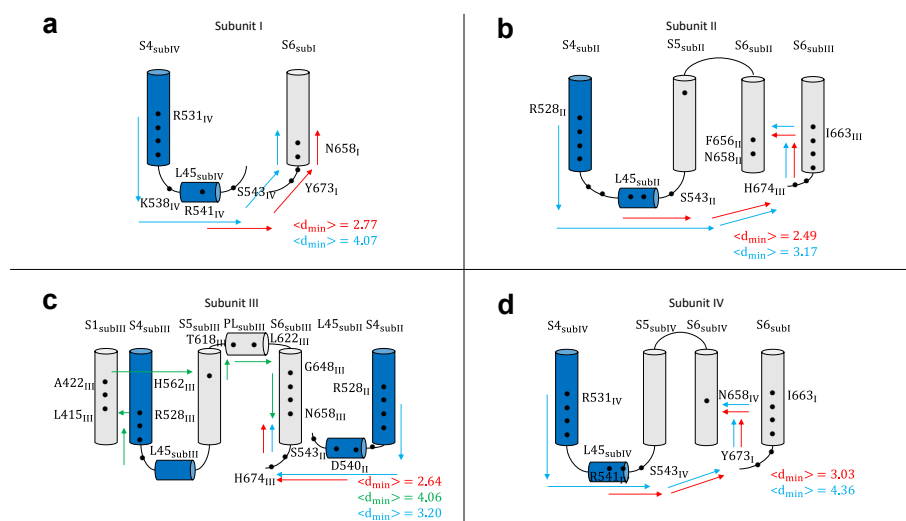

Supplementary Figure 13: Activation/deactivation pathways of the mutant T421M. Paths identified in the first subunit (**a**), in the second subunit (**b**), in the third subunit (**c**) and in the fourth subunit (**d**). Arrows describe the preferred routes of motion propagation: blue arrows refer to S4→L45→S5→S6 route; red arrows refer to L45→S6 or L45→S5→S6 route; green arrows refer to S4→S1→S5→S6. Black dots correspond to residues on the path with CI > 0.15. Average minimal path lengths  $\langle d_{\min} \rangle$  are also reported.

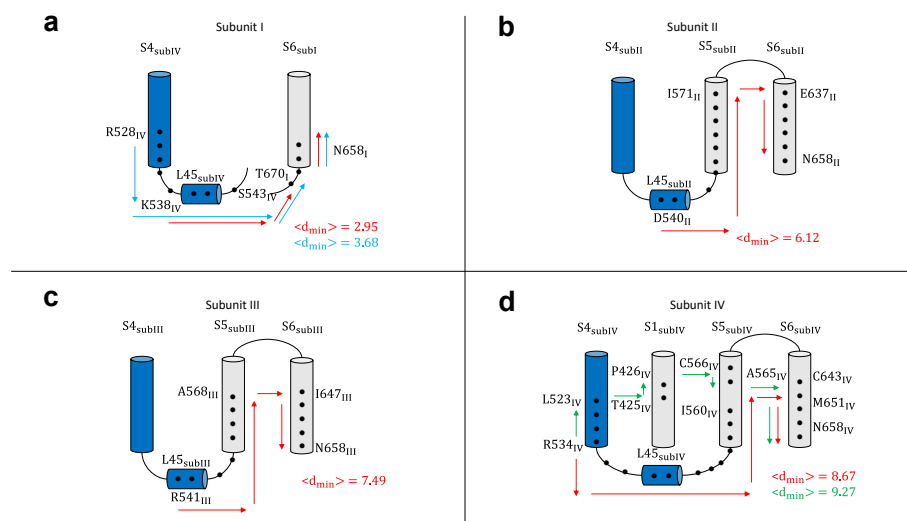

Supplementary Figure 14: Activation/deactivation pathways of the mutant R531Q. Paths identified in the first subunit (**a**), in the second subunit (**b**), in the third subunit (**c**) and in the fourth subunit (**d**). Arrows describe the preferred routes of motion propagation: blue arrows refer to  $S4 \rightarrow L45 \rightarrow S5 \rightarrow S6$  route; red arrows refer to  $L45 \rightarrow S6$  or  $L45 \rightarrow S5 \rightarrow S6$  route; green arrows refer to  $S4 \rightarrow S1 \rightarrow S5 \rightarrow S6$ . Black dots correspond to residues on the path with  $CI > 0.15$ . Average minimal path lengths  $\langle d_{\min} \rangle$  are also reported.

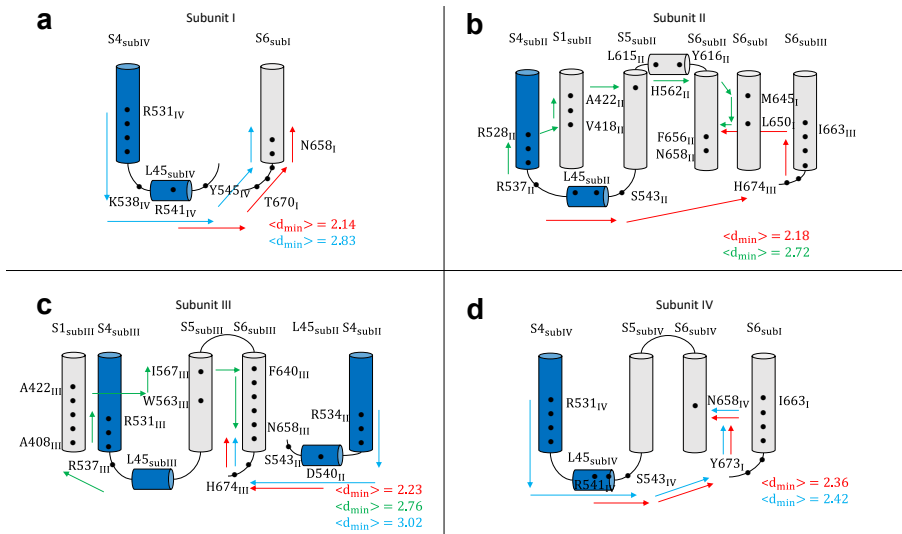

Supplementary Figure 15: Activation/deactivation pathways of the mutant A505V. Paths identified in the first subunit (a), in the second subunit (b), in the third subunit (c) and in the fourth subunit (d). Arrows describe the preferred routes of motion propagation: blue arrows refer to S4→L45→S5→S6 route; red arrows refer to L45→S6 or L45→S5→S6 route; green arrows refer to S4→S1→S5→S6. Black dots correspond to residues with  $CI > 0.15$ . Average minimal path lengths  $\langle d_{\min} \rangle$  are also reported.

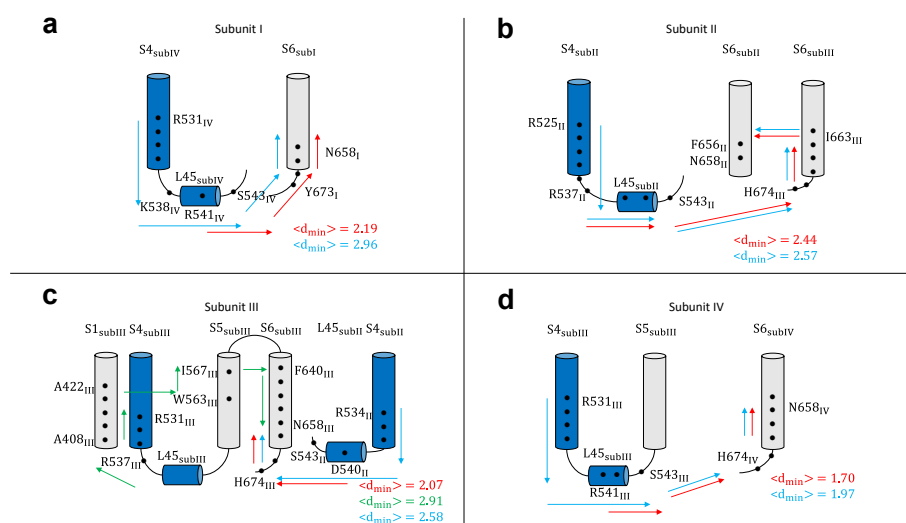

Supplementary Figure 16: Activation/deactivation pathways of the mutant F627A. Paths identified in the first subunit (**a**), in the second subunit (**b**), in the third subunit (**c**) and in the fourth subunit (**d**). Arrows describe the preferred routes of motion propagation: blue arrows refer to S4→L45→S5→S6 route; red arrows refer to L45→S6 or L45→S5→S6 route; green arrows refer to S4→S1→S5→S6. Black dots correspond to residues on the path with CI > 0.15. Average minimal path lengths  $\langle d_{\min} \rangle$  are also reported.

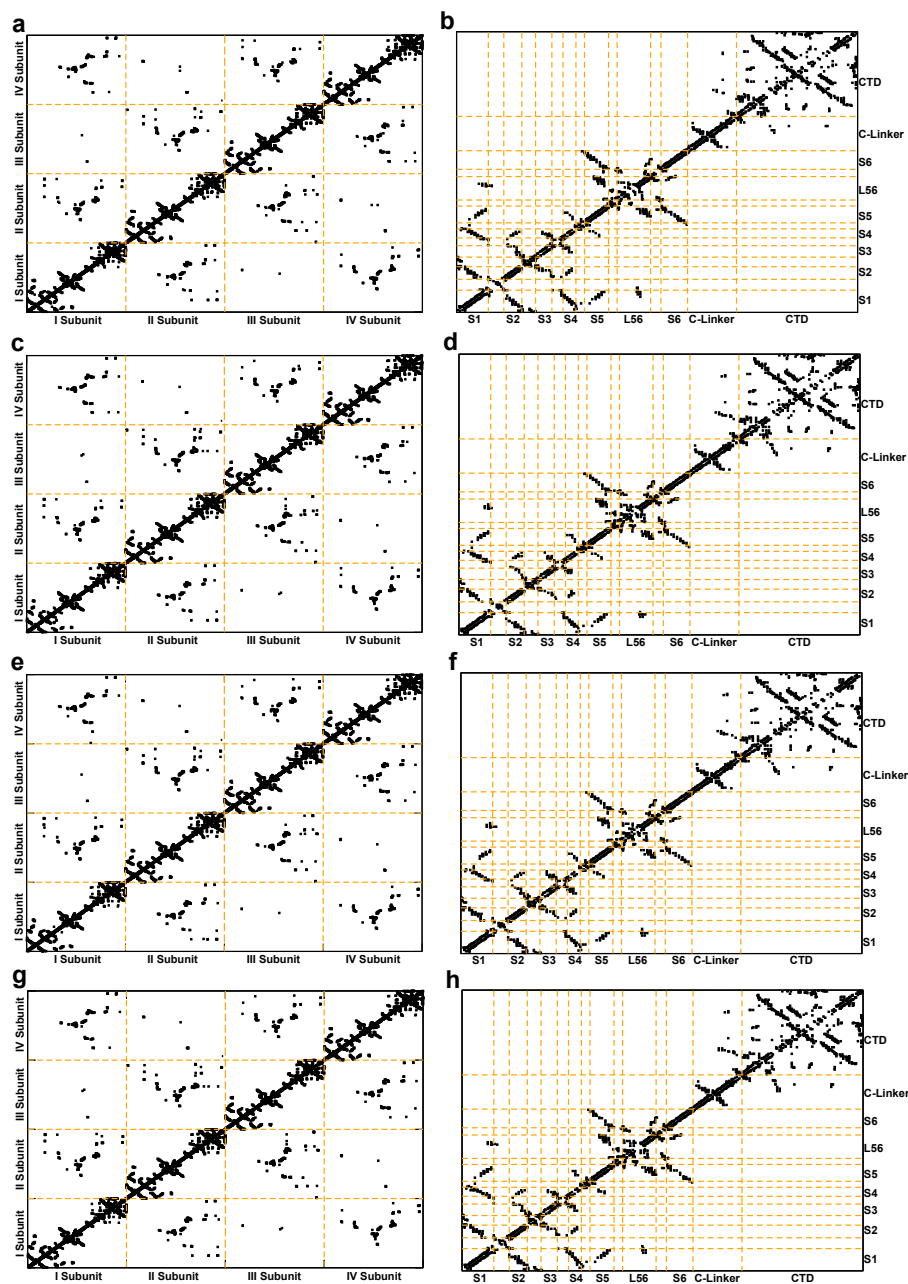

Supplementary Figure 17: Contact maps of the mutants T421M, R531Q, A505V and F627A. Panels (a) and (b) refer to T421M contact maps of the whole protein and of a single subunit, respectively. Panels (c) and (d) refer to R531Q contact maps of the whole protein and of a single subunit, respectively. Panels (e) and (f) refer to A505V contact maps of the whole protein and of a single subunit, respectively. Finally, panels (g) and (h) refer to F627A contact maps of the whole protein and of a single subunit, respectively. Black dots represent the formed interactions. In the single subunit maps the black dots are the formed interactions formed at least 75% of the trajectory in 3/4 subunits.

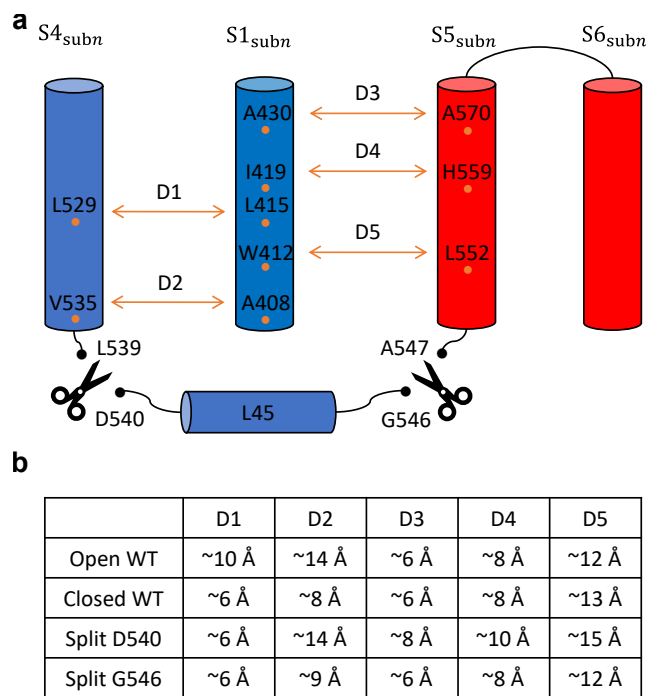

Supplementary Figure 18: Distances between S4, S1 and S5 of the split channels. (a) Schematic representation of the computational systems highlighting the cutting points and residues as reference points for the distances between S4, S1 and S5; (b) Average distances between S4-S1 and S1-S5 in WT and split channels.

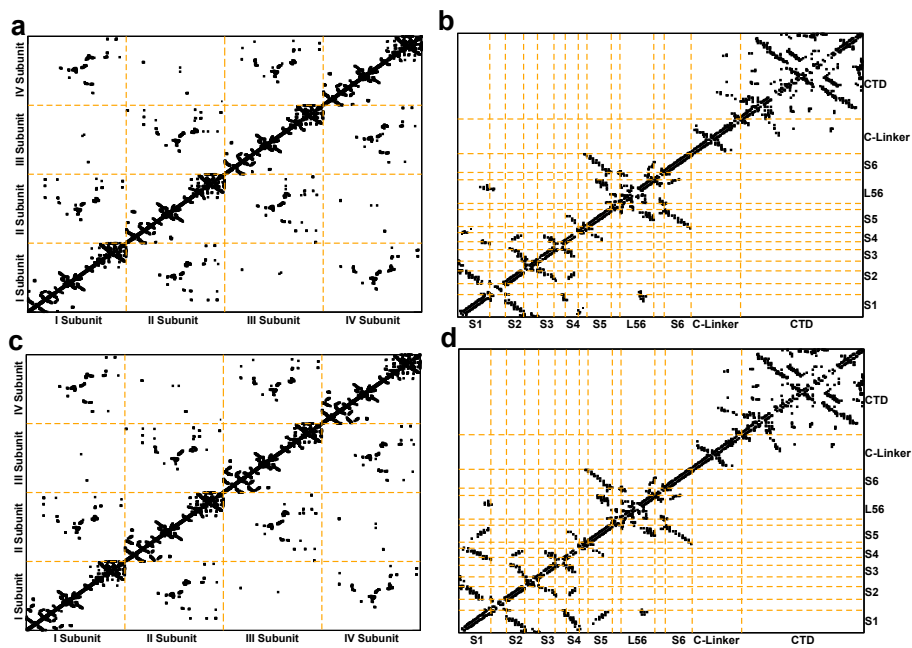

Supplementary Figure 19: Contact maps of the split channels. Panels (a) and (b) refer to the contact maps of the whole protein and of a single subunit in D540-cut channels; panels (c) and (d) refer to those in G546-cut channel. Black dots represent the formed interactions. In the single subunit maps the black dots are the formed interactions formed at least 75% of the trajectory in 3/4 subunits.

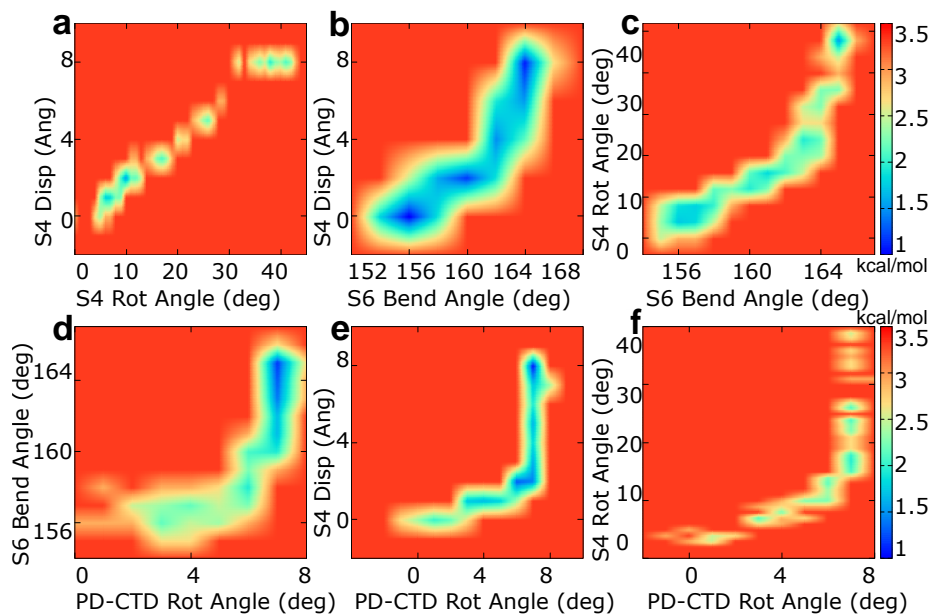

Supplementary Figure 20: Pseudo-potential of Mean Force for hERG with  $Q_g = 6e$  as a function of geometrical descriptors, relevant for the O→C transition. Pseudo-PMF maps as follows: S4 rotation vs S4 displacement (**a**); S6 bending vs S4 displacement (**b**); S6 bending vs S4 rotation (**c**); PD-CTD rotation vs S6 bending (**d**); PD-CTD rotation vs S4 displacement (**e**); PD-CTD rotation vs S4 rotation (**f**). Dashed lines are a guide to the eye. Bin widths are as follows: S4 displacement: 1.0 Å; S4 rotation: 2°; S6 bending: 1°; PD-CTD rot: 1°. Free energies were expressed in kcal/mol.



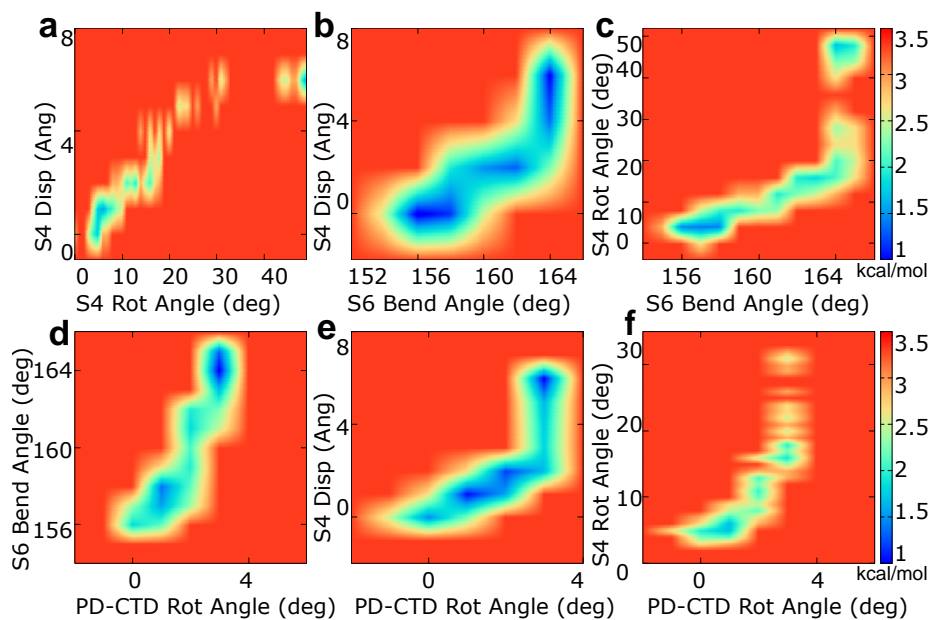

Supplementary Figure 21: Pseudo-potential of Mean Force for hERG with  $Q_g = 4e$  as a function of geometrical descriptors, relevant for the O→C transition. Pseudo-PMF maps as follows: S4 rotation vs S4 displacement (**a**); S6 bending vs S4 displacement (**b**); S6 bending vs S4 rotation (**c**); PD-CTD rotation vs S6 bending (**d**); PD-CTD rotation vs S4 displacement (**e**); PD-CTD rotation vs S4 rotation (**f**). Dashed lines are a guide to the eye. Bin widths are as follows: S4 displacement: 1.0 Å; S4 rotation: 2°; S6 bending: 1°; PD-CTD rot: 1°. Free energies were expressed in kcal/mol.

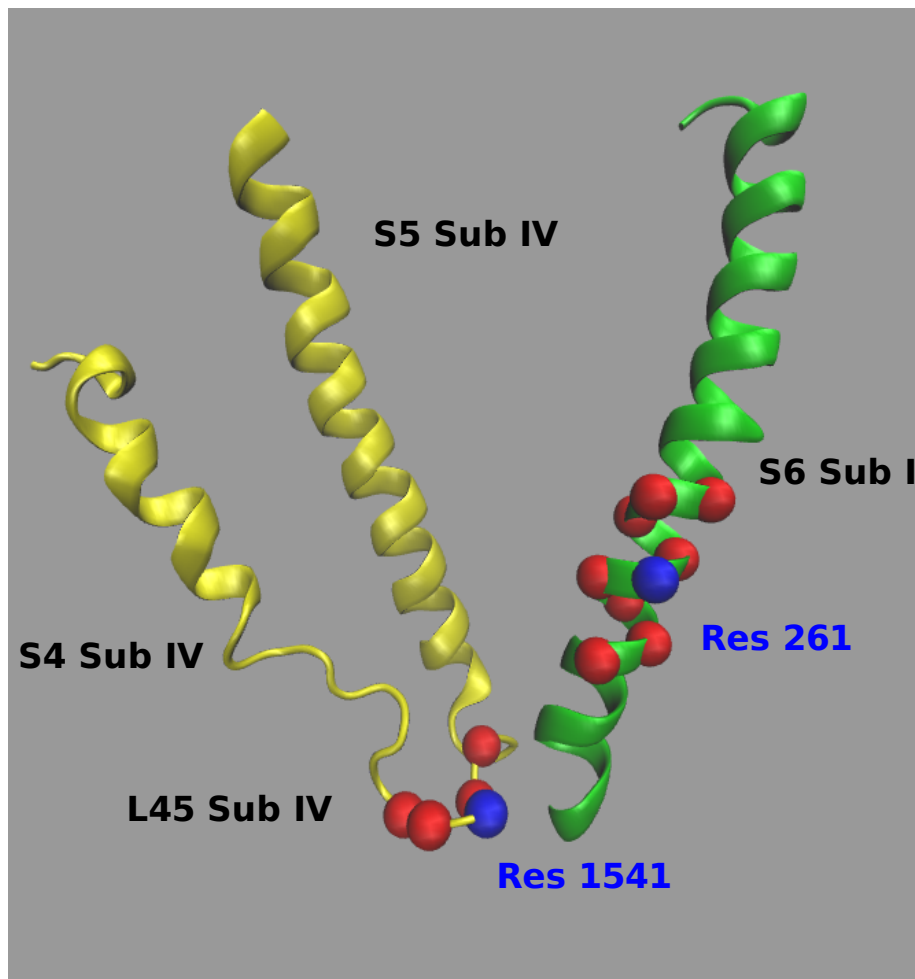

Supplementary Figure 22: Source and sink residues identified in loop L45 of subunit IV (yellow) and in helix S6 of subunit I (green). The central residues of the source and sink regions are shown as blue beads. The other residues of the source and sink regions (that can be found in at least 70% of the frames in a sphere of radius 7.0 Å centered on the central residues) are shown as red beads. See Supplementary Note 3 for more details.

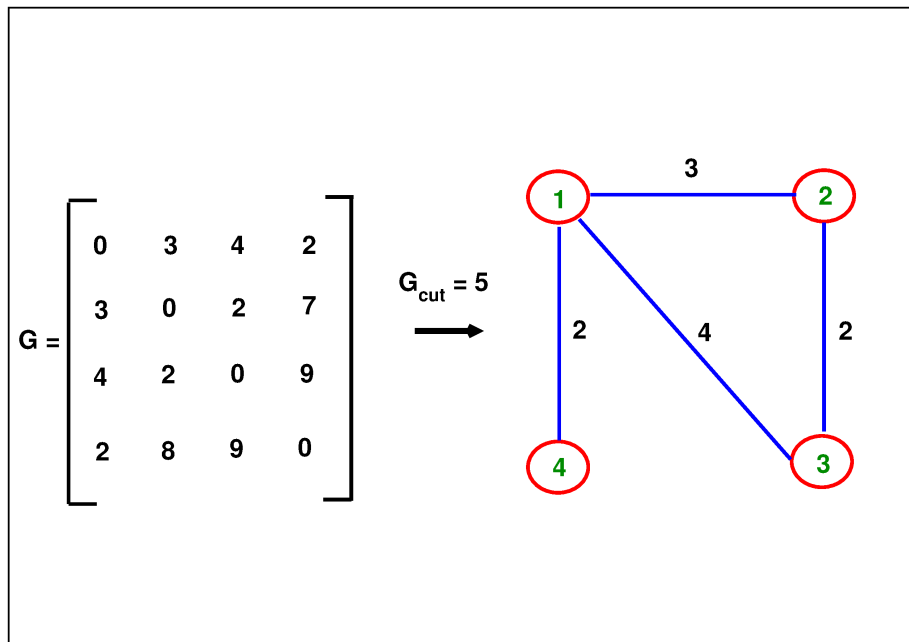

Supplementary Figure 23: Procedure of network building from the matrix  $G$  of information distances. Only pairs of nodes with an information distance  $G_{ij} < G_{cut}$  will be connected through an arc. More details can be found in Supplementary Note 3.

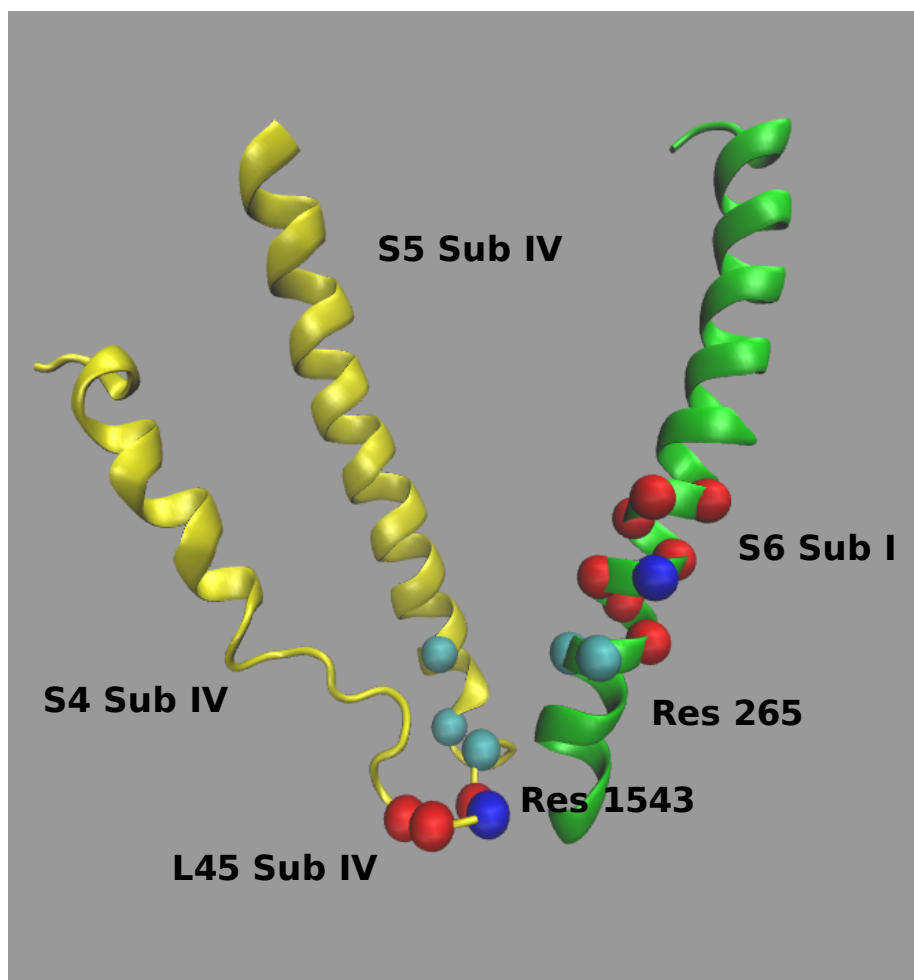

Supplementary Figure 24: An example of path (cyan beads) connecting residue 1543 in the source region with residue 265 in the sink region. The central residues of the source and sink region are shown in blue while the other residues of the two regions are coloured in red. For graphical clarity only the S4-L45-S5 region of subunit IV and helix S6 of subunit I are shown. For more detail see Supplementary Note 3.

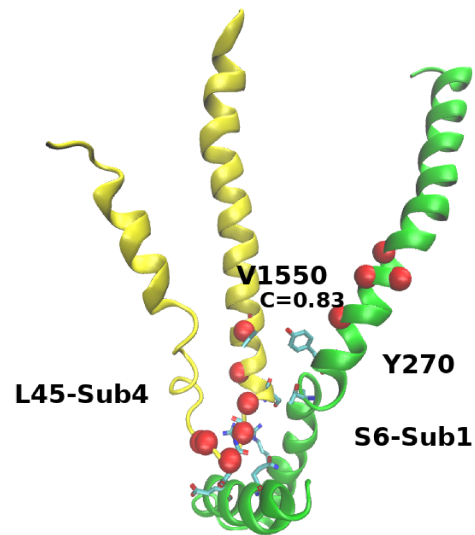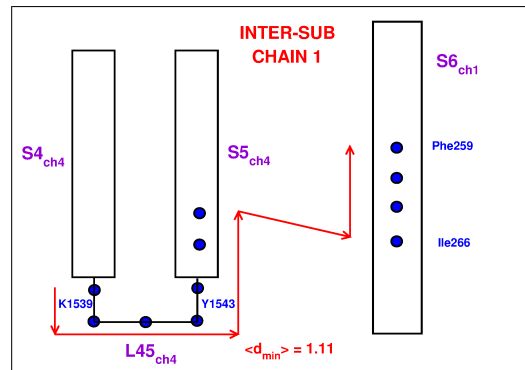

Supplementary Figure 25: Top panel: the distribution of residues with centrality index greater than 0.15 (red beads) outlines a communication pathway between loop L45 of subunit IV and helix S6 of subunit I. Residues involved in contacts between the two regions are portrayed in a stick representation. Lower panel: cartoon representation of the inter-subunit pathway ending on helix S6 of subunit I. The average path length was computed over all minimal paths computed with Dijkstra's algorithm. For more information see Supplementary Note 3.

|                     |             | D456-K525 | D411-K538 | E544-R665 |
|---------------------|-------------|-----------|-----------|-----------|
| CLOSED<br>$Q_g = 8$ | Subunit I   | 6.16 Å    | 6.95 Å    | 3.99 Å    |
|                     | Subunit II  | 4.91 Å    | 6.01 Å    | 3.61 Å    |
|                     | Subunit III | 4.82 Å    | 6.22 Å    | 4.26 Å    |
|                     | Subunit IV  | 4.65 Å    | 5.38 Å    | 4.02 Å    |
| CLOSED<br>$Q_g = 6$ | Subunit I   | 3.77 Å    | 4.48 Å    | 4.21 Å    |
|                     | Subunit II  | 5.35 Å    | 6.89 Å    | 3.61 Å    |
|                     | Subunit III | 4.52 Å    | 4.69 Å    | 4.69 Å    |
|                     | Subunit IV  | 4.77 Å    | 6.29 Å    | 4.57 Å    |
| CLOSED<br>$Q_g = 4$ | Subunit I   | 5.23 Å    | 3.07 Å    | 3.27 Å    |
|                     | Subunit II  | 4.38 Å    | 5.58 Å    | 3.65 Å    |
|                     | Subunit III | 6.09 Å    | 4.40 Å    | 5.34 Å    |
|                     | Subunit IV  | 4.32 Å    | 5.84 Å    | 5.29 Å    |

Supplementary Table 1: Distances for the salt bridges in hERG closed systems. For D456-K525 and D411-K538 the values refer to the distance between the  $\epsilon$ -Nitrogen of the lysines and the  $\delta$ -Oxygen of the aspartates; for E544-R665 the values refer to the distance between the  $\epsilon$ -Oxygen of the glutamates and the  $\epsilon$ -Nitrogen of the arginines.

| Residue | Centrality Index (CI)    | Betweenness |
|---------|--------------------------|-------------|
| A408    | $CI \geq 0.95$           | High        |
| W410    | $CI \geq 0.95$           | High        |
| D411    | $CI \geq 0.95$           | High        |
| V418    | $CI \geq 0.95$           | High        |
| Y420    | $CI \geq 0.95$           | High        |
| T421    | $CI \geq 0.95$           | High        |
| A422    | $CI \geq 0.95$           | High        |
| R528    | $0.85 \leq CI \leq 0.95$ | High        |
| L529    | $0.85 \leq CI \leq 0.95$ | High        |
| R531    | $0.55 \leq CI \leq 0.65$ | Medium      |
| R534    | $0.35 \leq CI \leq 0.45$ | Medium      |
| V535    | $0.25 \leq CI \leq 0.45$ | Medium      |
| R537    | $CI \geq 0.95$           | High        |
| K538    | $CI \geq 0.95$           | High        |
| D540    | $CI \geq 0.95$           | High        |
| R541    | $CI \geq 0.95$           | High        |
| Y542    | $CI \geq 0.95$           | High        |
| S543    | $CI \geq 0.95$           | High        |
| E544    | $CI \geq 0.95$           | High        |
| G546    | $CI \geq 0.95$           | High        |
| L552    | $CI \geq 0.95$           | High        |
| L553    | $0.85 \leq CI \leq 0.95$ | Medium      |
| F557    | $0.85 \leq CI \leq 0.95$ | Medium      |
| A558    | $0.70 \leq CI \leq 0.80$ | Medium      |
| L559    | $0.70 \leq CI \leq 0.80$ | Medium      |
| H562    | $CI \geq 0.95$           | High        |
| W563    | $0.80 \leq CI \leq 0.90$ | High        |
| L564    | $0.80 \leq CI \leq 0.90$ | Medium      |
| I567    | $0.80 \leq CI \leq 0.90$ | Medium      |
| W568    | $CI \geq 0.95$           | High        |
| L615    | $CI \geq 0.95$           | Medium      |
| Y616    | $CI \geq 0.95$           | Medium      |
| E637    | $0.75 \leq CI \leq 0.85$ | Medium      |
| F640    | $0.70 \leq CI \leq 0.80$ | Medium      |
| V644    | $0.70 \leq CI \leq 0.80$ | Medium      |
| M645    | $CI \geq 0.95$           | High        |
| I647    | $CI \geq 0.95$           | High        |
| L650    | $CI \geq 0.95$           | High        |
| M651    | $CI \geq 0.95$           | High        |
| S654    | $0.45 \leq CI \leq 0.55$ | Medium      |
| F656    | $0.75 \leq CI \leq 0.85$ | Medium      |
| N658    | $CI \geq 0.95$           | High        |
| I662    | $CI \geq 0.95$           | High        |
| I663    | $CI \geq 0.95$           | High        |
| Y673    | $CI \geq 0.95$           | High        |
| H674    | $CI \geq 0.95$           | High        |

Supplementary Table 2: Centrality Index (CI) and betweenness (B) of each residue implicated in the paths. Legend betweenness (B): low  $0 < B \leq 1$ ; medium:  $1 < B \leq 4$ ; high:  $4 < B \leq B_{max}$

| Source residues |                |
|-----------------|----------------|
| Serial index    | Residue number |
| 1               | 273            |
| 2               | 1539           |
| 3               | 1540           |
| 4               | 1541           |
| 5               | 1542           |
| 6               | 1543           |
| Sink residues   |                |
| 1               | 257            |
| 2               | 258            |
| 3               | 259            |
| 4               | 260            |
| 5               | 261            |
| 6               | 262            |
| 7               | 263            |
| 8               | 264            |
| 9               | 265            |
| 10              | 732            |

Supplementary Table 3: Source and sink residues identified for the calculation of communication pathways between loop L45 of Subunit IV and helix S6 of Subunit I in the system with gating charge  $4e$ . See Supplementary Note 3 for more details.

|                              | $Q_g = 4e$             | $Q_g = 6e$             | $Q_g = 8e$             |
|------------------------------|------------------------|------------------------|------------------------|
| Min Variance in Whole Matrix | 0.000                  | 0.000                  | 0.000                  |
| Max Variance in Whole Matrix | 20.518                 | 12.569                 | 16.311                 |
| Avg Variance in Whole Matrix | 0.296                  | 0.292                  | 0.293                  |
| Min Variance in the Network  | $6.657 \times 10^{-6}$ | $1.504 \times 10^{-5}$ | $3.404 \times 10^{-6}$ |
| Max Variance in the Network  | 20.518                 | 12.569                 | 16.311                 |
| Avg Variance in the Network  | 0.301                  | 0.297                  | 0.297                  |

Supplementary Table 4: Minimum, maximum and average value of the variance both considering all elements of the matrix or just the most correlated pairs of residues ( $\langle (G_{ij})_B \rangle < G_{cut}$ ).



| System with $Q_g = 8e$                                                |         |                      |
|-----------------------------------------------------------------------|---------|----------------------|
| Residues on the Inter-Subunit path<br>S4(IV)→L45(IV)→S6(I)            | Average | Variance of the Mean |
| R531-R534                                                             | 0.5503  | 5.2522 x 10-3        |
| R534-V535                                                             | 0.1603  | 1.0749 x 10-3        |
| V535-R537                                                             | 0.4014  | 1.6772 x 10-3        |
| R537-K538                                                             | 0.1578  | 1.7875 x 10-3        |
| K538-R541                                                             | 0.4271  | 1.0073 x 10-3        |
| R541-S543                                                             | 0.3201  | 1.7564 x 10-3        |
| S543-Y673                                                             | 0.3478  | 5.1914 x 10-2        |
| Y673-I663                                                             | 0.3180  | 7.0954 x 10-2        |
| I663-I662                                                             | 0.2040  | 2.0358 x 10-3        |
| I662-N658                                                             | 0.3289  | 1.1647 x 10-3        |
|                                                                       |         |                      |
| Residues on the Intra-Subunit path<br>S4(III)→S1(III)→S5(III)→S6(III) | Average | Variance of the Mean |
| R537-V535                                                             | 0.2719  | 1.7215 x 10-1        |
| V535-R534                                                             | 0.1443  | 2.3312 x 10-3        |
| R534-R531                                                             | 0.2689  | 1.1762 x 10-3        |
| R531-A408                                                             | 0.5191  | 1.9440 x 10-2        |
| A408-W410                                                             | 0.2125  | 1.6261 x 10-3        |
| W410-D411                                                             | 0.1252  | 1.6004 x 10-3        |
| D411-T421                                                             | 0.6234  | 1.0774 x 10-2        |
| T421-A422                                                             | 0.1854  | 3.3200 x 10-3        |
| A422-W563                                                             | 0.3974  | 7.5543 x 10-4        |
| W563-I567                                                             | 0.2156  | 5.2802 x 10-4        |
| I567-F640                                                             | 0.4552  | 2.7933 x 10-3        |
| F640-V644                                                             | 0.3478  | 4.3948 x 10-3        |
| V644-I647                                                             | 0.2950  | 7.3684 x 10-4        |
| I647-F656                                                             | 0.5306  | 1.0186 x 10-2        |
| F656-N658                                                             | 0.3529  | 2.8043 x 10-3        |

Supplementary Table 5: Variance analysis of the pathways for the systems with gating charge  $Q_g = 8e$ .

| System with $Q_g = 6e$                                            |         |                      |
|-------------------------------------------------------------------|---------|----------------------|
| Residues on the Intra-Subunit path<br>S4(I)→L45(I)→S6(I)          | Average | Variance of the Mean |
| R531-R534                                                         | 0.5653  | 2.2978 x 10-3        |
| R534-V535                                                         | 0.1875  | 2.6695 x 10-4        |
| V535-R537                                                         | 0.5656  | 2.3842 x 10-2        |
| R537-K538                                                         | 0.2387  | 1.0461 x 10-3        |
| K538-Y542                                                         | 0.9294  | 0.1269               |
| Y542-S543                                                         | 0.2178  | 2.3915 x 10-3        |
| S543-E544                                                         | 0.2124  | 1.7447 x 10-3        |
| E544-G546                                                         | 0.4526  | 5.6113 x 10-3        |
| G546-I662                                                         | 0.7260  | 2.5726 x 10-2        |
| I662-N658                                                         | 0.2858  | 4.6942 x 10-3        |
|                                                                   |         |                      |
| Residues on the Intra-Subunit path<br>S4(IV)→S1(IV)→S5(IV)→S6(IV) | Average | Variance of the Mean |
| Y542-R541                                                         | 0.3779  | 1.5757 x 10-2        |
| R541-D540                                                         | 0.1257  | 2.2496 x 10-5        |
| D540-K538                                                         | 0.4351  | 2.0983 x 10-2        |
| K538-R537                                                         | 0.2229  | 3.4329 x 10-3        |
| R537-V535                                                         | 0.4212  | 3.6303 x 10-2        |
| V535-R534                                                         | 0.2488  | 9.4591 x 10-3        |
| R534-D411                                                         | 0.5707  | 7.1781 x 10-2        |
| D411-I414                                                         | 0.1680  | 1.4495 x 10-3        |
| I414-L416                                                         | 0.1599  | 7.1927 x 10-4        |
| L416-V418                                                         | 0.1984  | 1.4448 x 10-3        |
| V418-L564                                                         | 0.6238  | 4.2837 x 10-3        |
| L564-I647                                                         | 0.7336  | 4.7687 x 10-3        |
| I647-L650                                                         | 0.6742  | 1.0124 x 10-2        |
| L650-M651                                                         | 0.2968  | 1.0005 x 10-3        |
| M651-S654                                                         | 0.3196  | 1.4592 x 10-3        |
| S654-F656                                                         | 0.3064  | 1.1015 x 10-3        |
| F656-N658                                                         | 0.2469  | 1.5892 x 10-3        |

Supplementary Table 6: Variance analysis of the pathways for the systems with gating charge  $Q_g = 6e$ .

| System with $Q_g = 4e$                                                 |         |                      |
|------------------------------------------------------------------------|---------|----------------------|
| Residues on the Intra-Subunit path<br>S4(II)→S1(II)→S5(II)→S6(II)      | Average | Variance of the Mean |
| S543-D540                                                              | 0.8007  | 5.7774 x 10-2        |
| D540-K538                                                              | 0.3639  | 2.7237 x 10-3        |
| K538-V535                                                              | 0.4844  | 1.0767 x 10-2        |
| V535-R531                                                              | 0.4509  | 9.1011 x 10-3        |
| R531-L529                                                              | 0.2687  | 2.8274 x 10-3        |
| L529-T421                                                              | 0.4868  | 3.2800 x 10-3        |
| T421-A422                                                              | 0.1364  | 1.0259 x 10-4        |
| A422-H562                                                              | 0.4096  | 1.4083 x 10-3        |
| H562-F640                                                              | 0.7829  | 4.9195 x 10-3        |
| F640-V644                                                              | 0.3511  | 1.7799 x 10-3        |
| V644-I647                                                              | 0.3106  | 2.0210 x 10-3        |
| I647-M651                                                              | 0.4589  | 1.8192 x 10-3        |
| M651-S654                                                              | 0.3247  | 2.2810 x 10-3        |
| S654-N658                                                              | 0.2982  | 6.3588 x 10-4        |
|                                                                        |         |                      |
| Residues on the Intra-Subunit path<br>S4(III)→L45(III)→S5(III)→S6(III) | Average | Variance of the Mean |
| R531-R534                                                              | 0.5804  | 2.2022 x 10-2        |
| R534-V535                                                              | 0.2176  | 4.2242 x 10-4        |
| V535-K538                                                              | 0.8161  | 4.5097 x 10-3        |
| K538-D540                                                              | 0.4147  | 5.0377 x 10-3        |
| D540-R541                                                              | 0.1861  | 2.4843 x 10-5        |
| R541-Y542                                                              | 0.1783  | 1.1731 x 10-3        |
| Y542-S543                                                              | 0.2066  | 7.0971 x 10-4        |
| S543-E544                                                              | 0.1962  | 1.7119 x 10-4        |
| E544-G546                                                              | 0.4971  | 1.3107 x 10-2        |
| G546-L552                                                              | 0.4719  | 1.7032 x 10-2        |
| L552-L553                                                              | 0.1181  | 2.5540 x 10-4        |
| L553-F557                                                              | 0.2328  | 1.2514 x 10-3        |
| F557-S654                                                              | 0.7629  | 3.9073 x 10-2        |
| S654-F656                                                              | 0.4206  | 7.2767 x 10-3        |
| F656-N658                                                              | 0.2547  | 8.0104 x 10-4        |

Supplementary Table 7: Variance analysis of the pathways for the systems with gating charge  $Q_g = 4e$ .

## 269 Supplementary References

- 270 [1] M. Zhang, J. Liu, M. Jiang, D.-M. Wu, K. Sonawane, H. Guy, and G.-  
271 N. Tseng, “Interactions between charged residues in the transmembrane  
272 segments of the voltage-sensing domain in the hERG channel,” *The Journal*  
273 *of membrane biology*, vol. 207, no. 3, pp. 169–181, 2005.
- 274 [2] D. R. Piper, A. Varghese, M. C. Sanguinetti, and M. Tristani-Firouzi,  
275 “Gating currents associated with intramembrane charge displacement in  
276 HERG potassium channels,” *Proceedings of the National Academy of Sci-*  
277 *ences*, vol. 100, no. 18, pp. 10534–10539, 2003.
- 278 [3] M. Sanguinetti and Q. Xu, “Mutations of the S4-S5 linker alter activation  
279 properties of HERG potassium channels expressed in *Xenopus* oocytes,” *The*  
280 *Journal of Physiology*, vol. 514, no. 3, pp. 667–675, 1999.
- 281 [4] M. Tristani-Firouzi, J. Chen, and M. C. Sanguinetti, “Interactions between  
282 S4-S5 linker and S6 transmembrane domain modulate gating of HERG K+  
283 channels,” *Journal of Biological Chemistry*, vol. 277, no. 21, pp. 18994–  
284 19000, 2002.
- 285 [5] J. Guo, S. Durdagi, M. Changalov, L. L. Perissinotti, J. M. Hargreaves,  
286 T. G. Back, S. Y. Noskov, and H. J. Duff, “Structure driven design of novel  
287 human ether-a-go-go-related-gene channel (hERG1) activators,” *PloS one*,  
288 vol. 9, no. 9, p. e105553, 2014.
- 289 [6] O. A. Malak, Z. Es-Salah-Lamoureux, and G. Loussouarn, “hERG S4-S5  
290 linker acts as a voltage-dependent ligand that binds to the activation gate  
291 and locks it in a closed state,” *Scientific reports*, vol. 7, no. 1, pp. 1–12, 2017.
- 292 [7] C. M. McBride, A. M. Smith, J. L. Smith, A. R. Reloj, E. J. Velasco, J. Pow-  
293 ell, C. S. Elayi, D. C. Bartos, D. E. Burgess, and B. P. Delisle, “Mechanistic  
294 basis for type 2 long QT syndrome caused by KCNH2 mutations that disrupt  
295 conserved arginine residues in the voltage sensor,” *The Journal of membrane*  
296 *biology*, vol. 246, no. 5, pp. 355–364, 2013.
- 297 [8] K. Phan, C. A. Ng, E. David, D. Shishmarev, P. W. Kuchel, J. I. Vanden-  
298 berg, and M. D. Perry, “The S1 helix critically regulates the finely tuned  
299 gating of Kv11. 1 channels,” *Journal of Biological Chemistry*, vol. 292, no. 18,  
300 pp. 7688–7705, 2017.
